# Supplementary material for: A Surprising Prevention Success: Why Did the HIV Epidemic Decline in Zimbabwe?
Source: PubMed Central journal article supplement (PMC3035617; doi:10.1371/journal.pmed.1000414), 2011-02-08

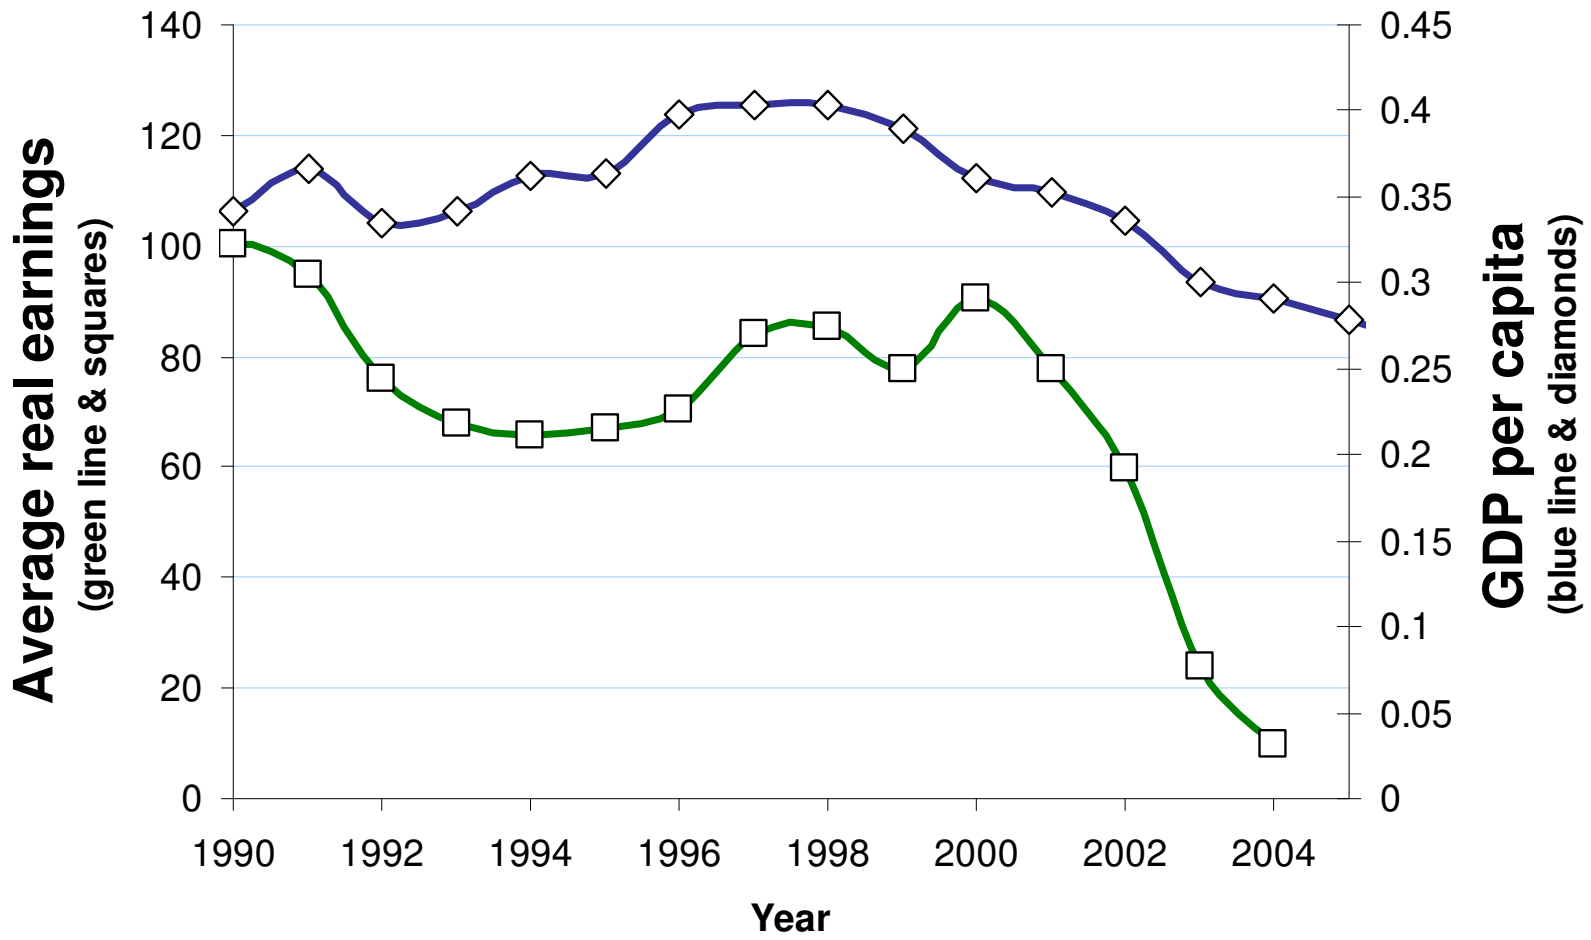

Supplement: pmed.1000414.s003.pdf [file pmed.1000414.s003.pdf]
