# Supplementary material for: A Surprising Prevention Success: Why Did the HIV Epidemic Decline in Zimbabwe?
Source: PLOS journal article supplement (doi:10.1371/journal.pmed.1000414), 2011-02-08

**Figure S2: Relationships between Proximal and Distal Factors  
For Behavior Change and HIV Decline in Zimbabwe**

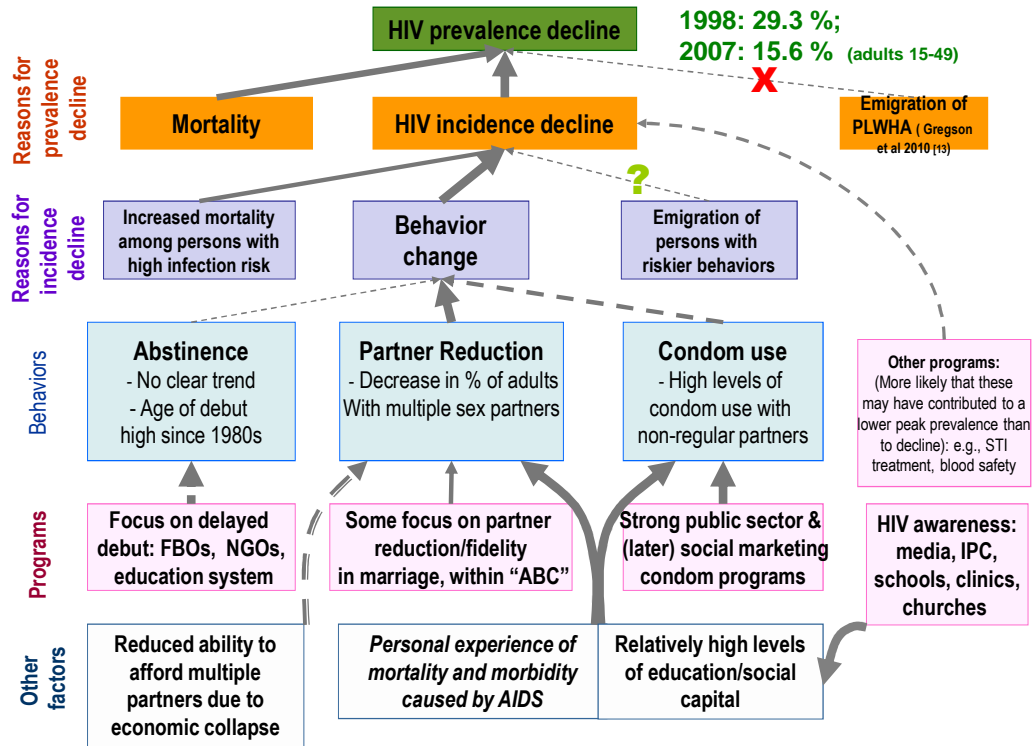

Supplement: S2 (10.1371/journal.pmed.1000414.s002) [file journal.pmed.1000414.s002]
